# Supplementary material for: Burn Severity Assessment Using Sentinel-1 SAR in the Southeast Peruvian Amazon, a Case Study of Madre de Dios
Source: MDPI journal article supplement (doi:10.3390/fire5040094), 2022-07-08
Supplement: s1 [file s1]

Supplementary material.

Table S1. Sentinel-1 image acquisition information.

| Sensor     | Platform | Orbit direction | Sensor mode                                                                      | Polarization | Product                             | Period    | Coverage              | Data of image         |
|------------|----------|-----------------|----------------------------------------------------------------------------------|--------------|-------------------------------------|-----------|-----------------------|-----------------------|
| Sentinel-1 | 1A       | Descending      | Interferometric Wide Swath (IW): 250 km with a moderate resolution of 5 m × 20 m | VV           | Level-1 GRD (Ground Range Detected) | Pre-fire  | District of Tahuamanu | May 16 and 21, 2020   |
|            |          |                 |                                                                                  | VH           |                                     | Post-fire |                       | October 1 and 6, 2020 |

**Tabla S2.** Sentinel-1 satellite image characteristics.

| Parameter                       | Sentinel-1                                                        |
|---------------------------------|-------------------------------------------------------------------|
| Launch date                     | April 03, 2014 from S1-A<br>April 22, 2016 from S1-B              |
| Orbit type                      | SSO (sun-synchronous orbit) 12-day repeat cycle LTAN = 18:00 hrs. |
| Orbital altitude                | 693 kilometers                                                    |
| Sensors complement              | C-SAR (C-band synthetic aperture radar)                           |
| Spacecraft Mass Spacecraft Size | 2,300 kg 3.4 m × 1.3 m × 1.3 m × 1.3 m 4.8 kW (EOL)               |
| Spacecraft Power                |                                                                   |
| Downlink X-band data rate       | 520 Mbit/s                                                        |
| S-band TT&C                     | 64 kbit/s uplink 128 kbit/s 2 Mbit/s downlink                     |
| Science data storage            | 1.4 Tbit (EOL)                                                    |
| Required data quality           | BER (bit error rate): < 10 <sup>-9</sup>                          |
| Operational autonomy            | 8 days                                                            |
| Prime contractor                | TAS-I (Thales Alenia Space-Italy)                                 |
| Baseline Launcher               | Soyuz (Kourou)                                                    |

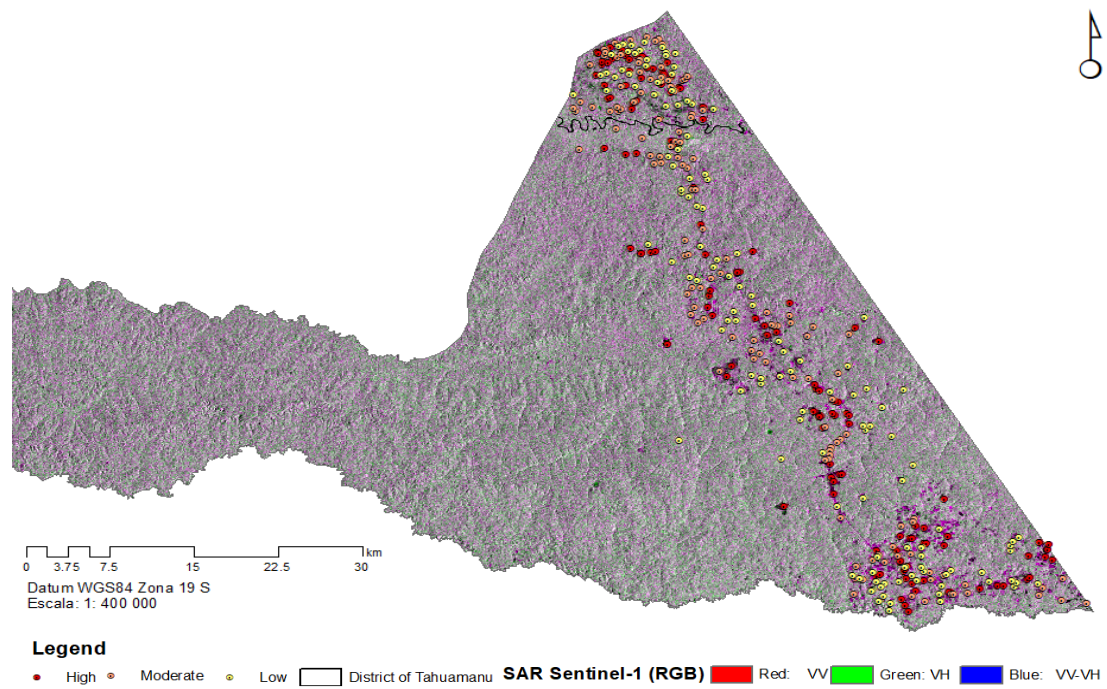

**Figure S1.** Distribution of samples to validate the severity of burns in the district of Tahuamanu, southeastern Peruvian Amazon.

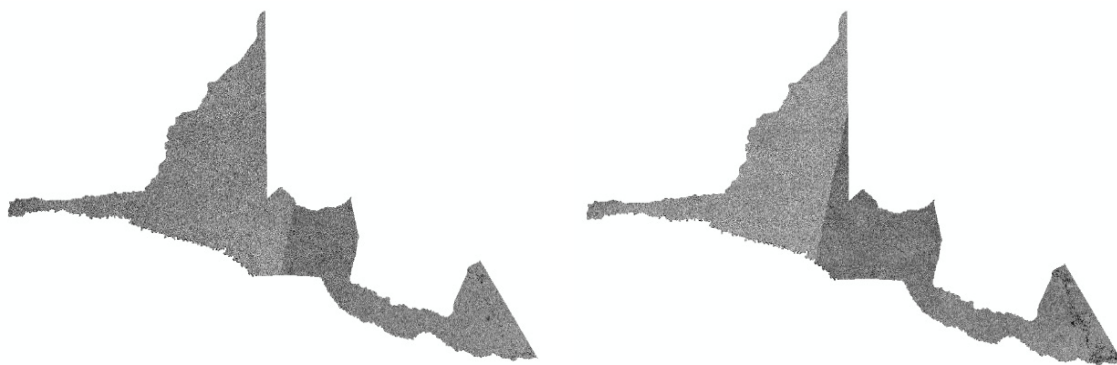

**Figure S2.** Sentinel-1 C-band SAR images with VV polarization; pre and post fire 2020.

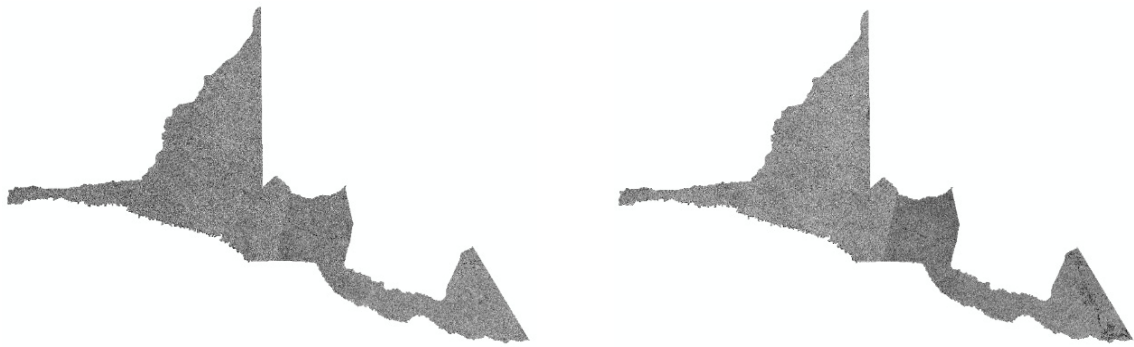

**Figure S3.** Sentinel-1 C-band SAR images with VH polarization; pre and post fire 2020.

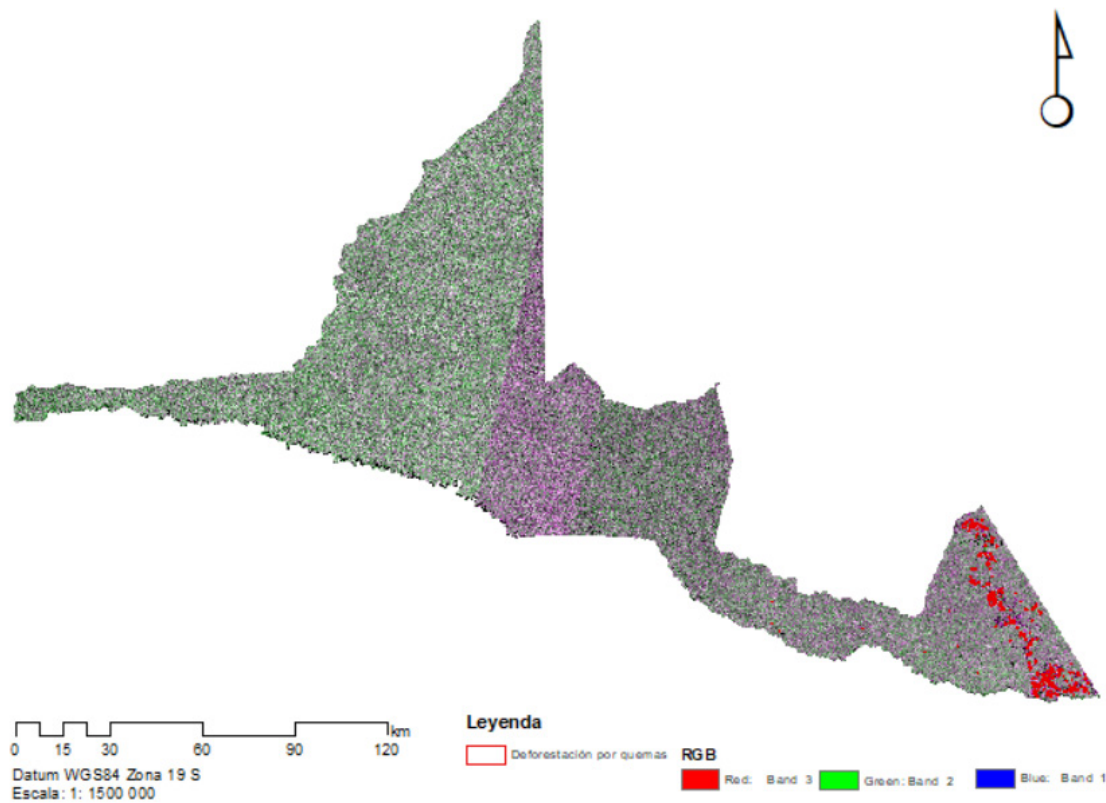

**Figure S4.** Determination of burned areas using absolute and relative values of pre- and post-fire 2020 VV<sub>1</sub> backscatter data; Equation 1 and 3.

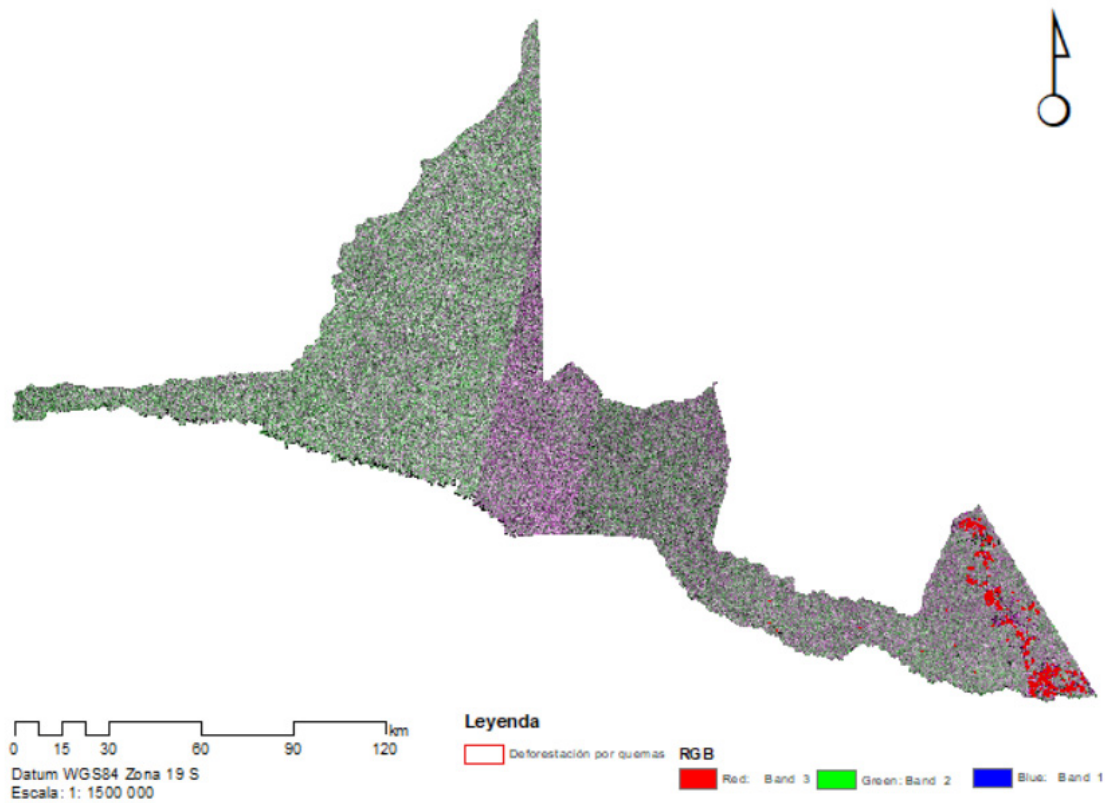

**Figure S5.** Determination of burned areas using absolute and relative values of pre- and post-fire 2020 VV<sub>2</sub> backscatter data; Equation 1 and 5.

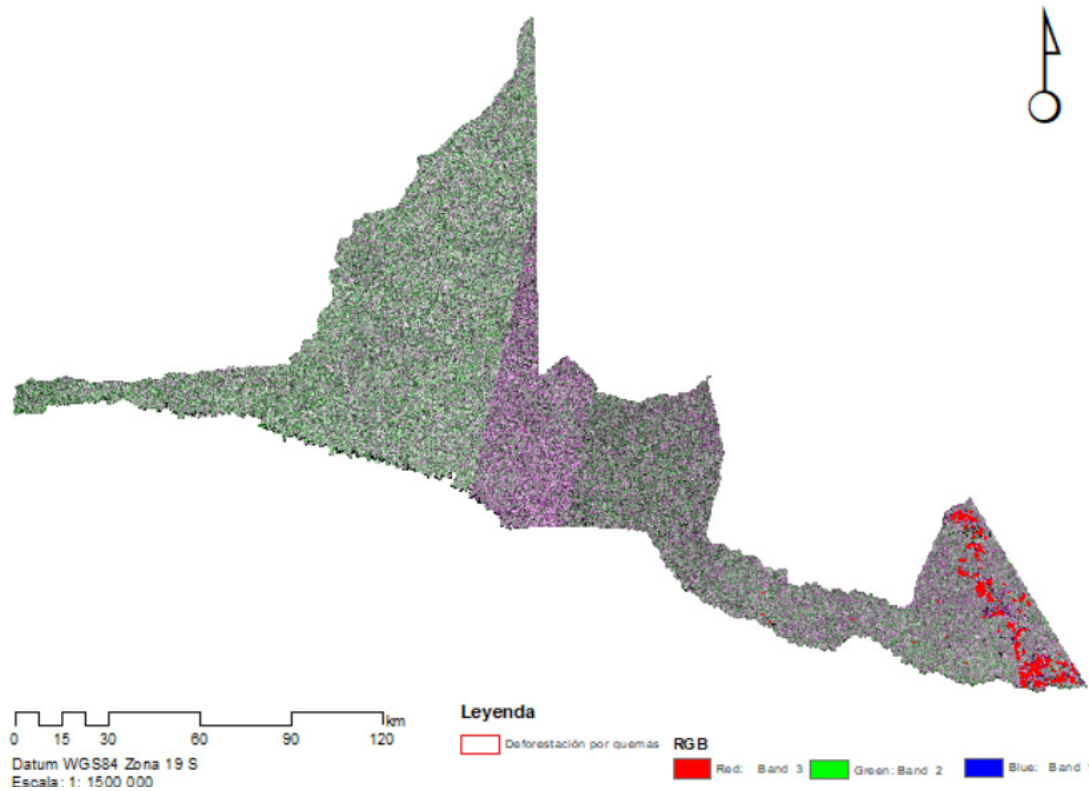

**Figure S6.** Determination of burned areas using absolute and relative values of pre- and post-fire 2020 VH<sub>1</sub> backscatter data; Equation 2 and 4.



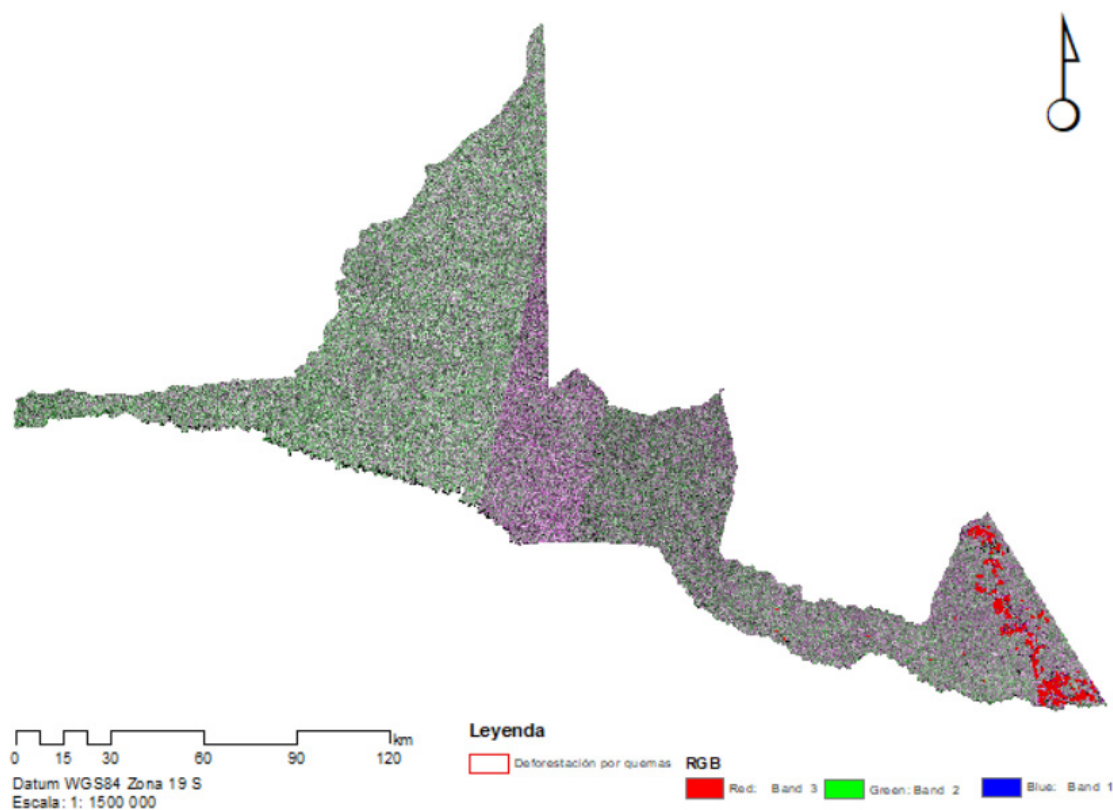

**Figure S7.** Determination of burned areas using absolute and relative values of pre- and post-fire 2020 VH<sub>2</sub> backscatter data; Equation 2 and 6.

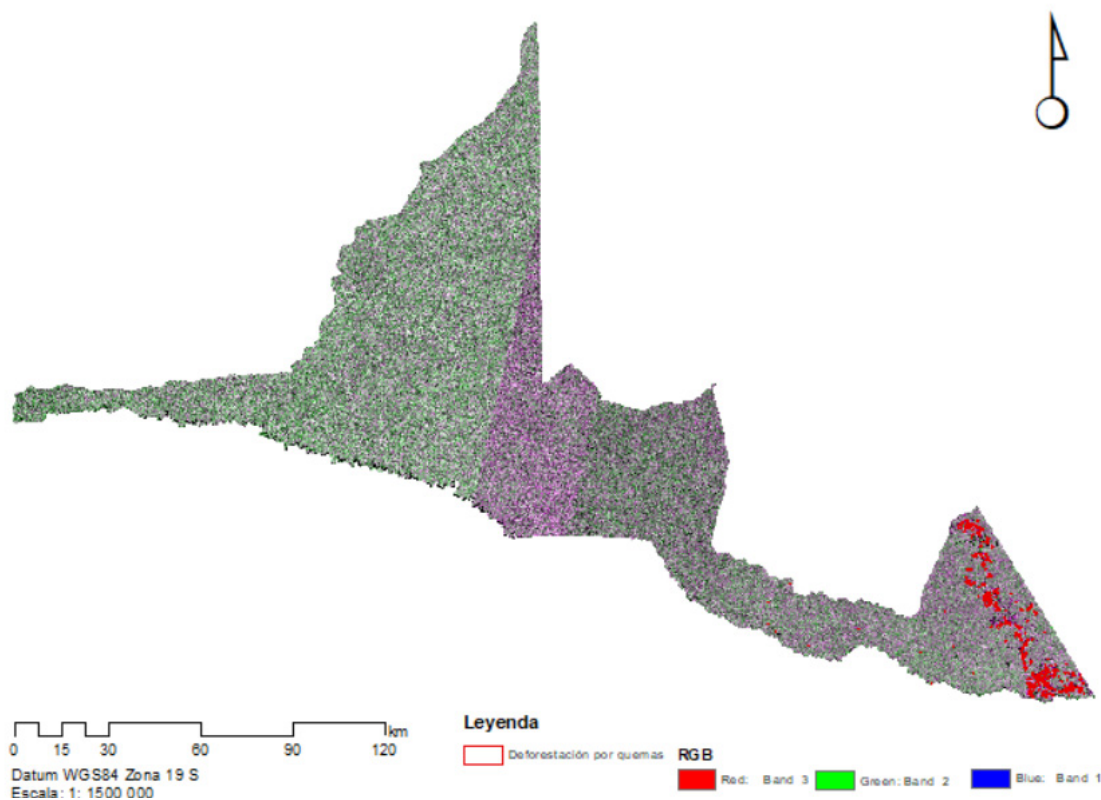

**Figure S8.** Determination of burned areas through Burn Ratio (RBR) by RADAR Forest Degradation Index (RDFI) from pre- and post-fire 2020 VV and VH backscatter data; Equation 8 and 9.

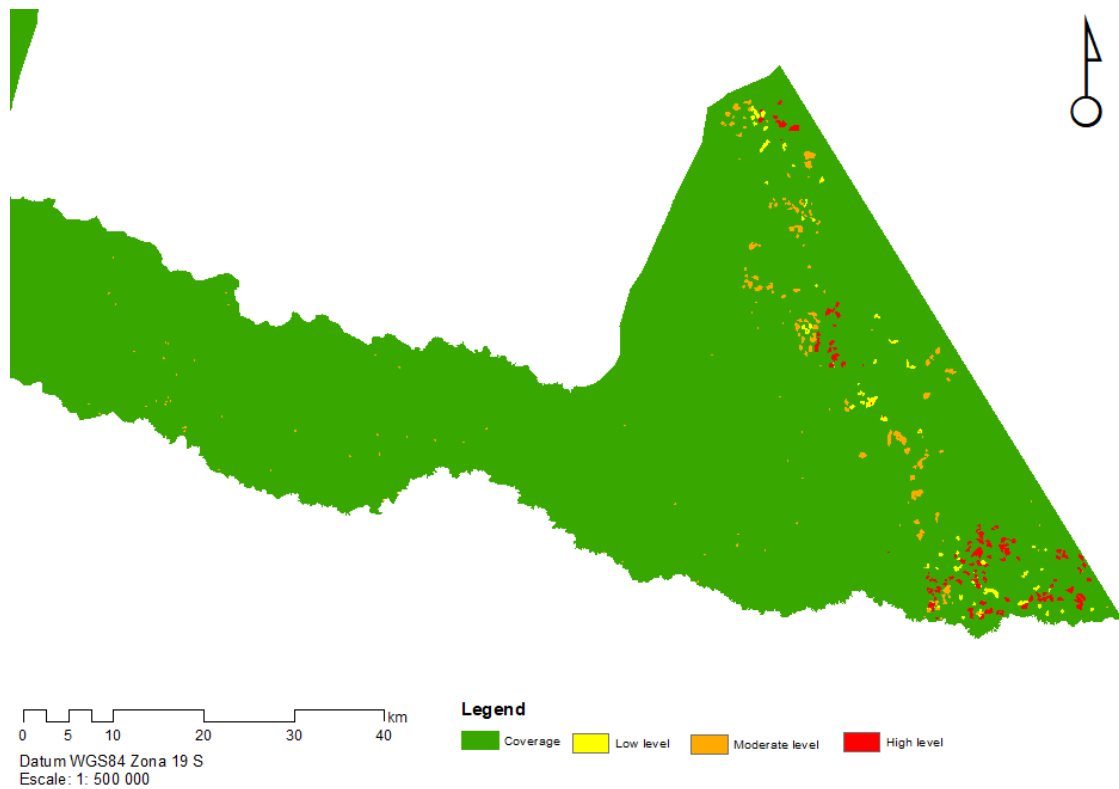

**Figure S9.** Burn severity using absolute, relative values from VV\_1 pre- and post-fire 2020 backscatter data; Equation 1 and 3.



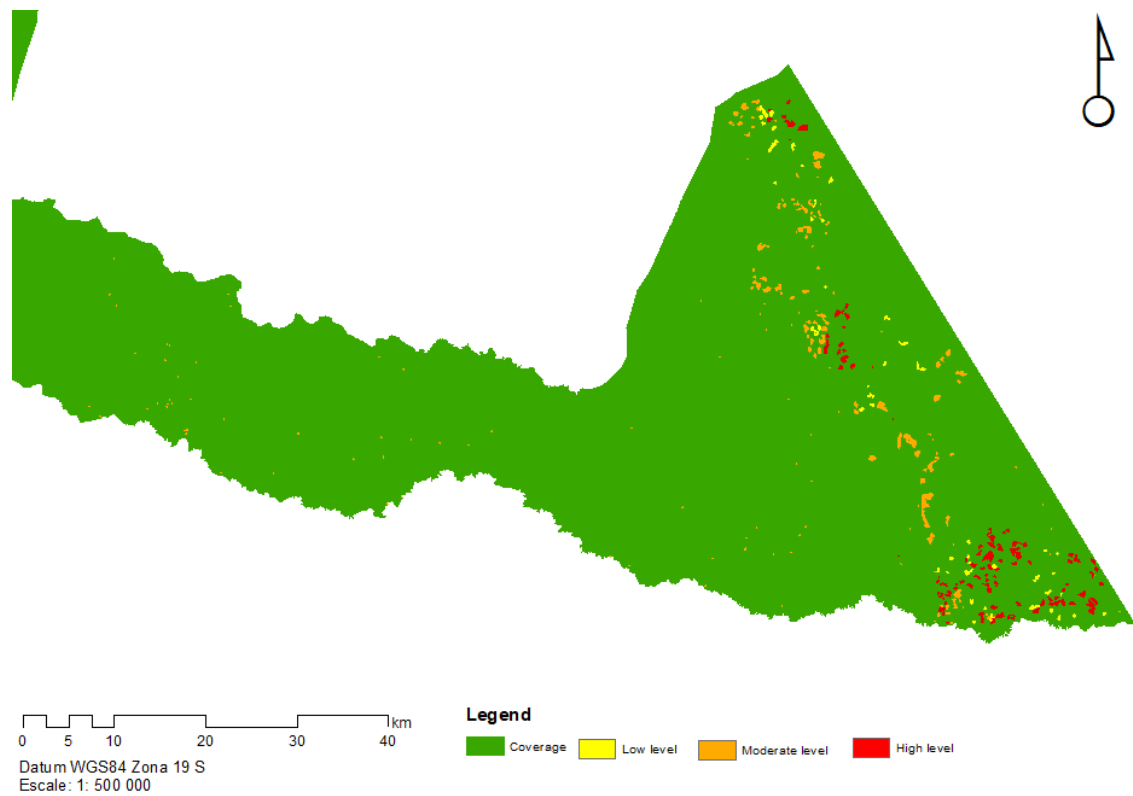

**Figure S11.** Burn severity using absolute, relative values from VH\_1 pre- and post-fire 2020 backscatter data; Equation 2 and 4.

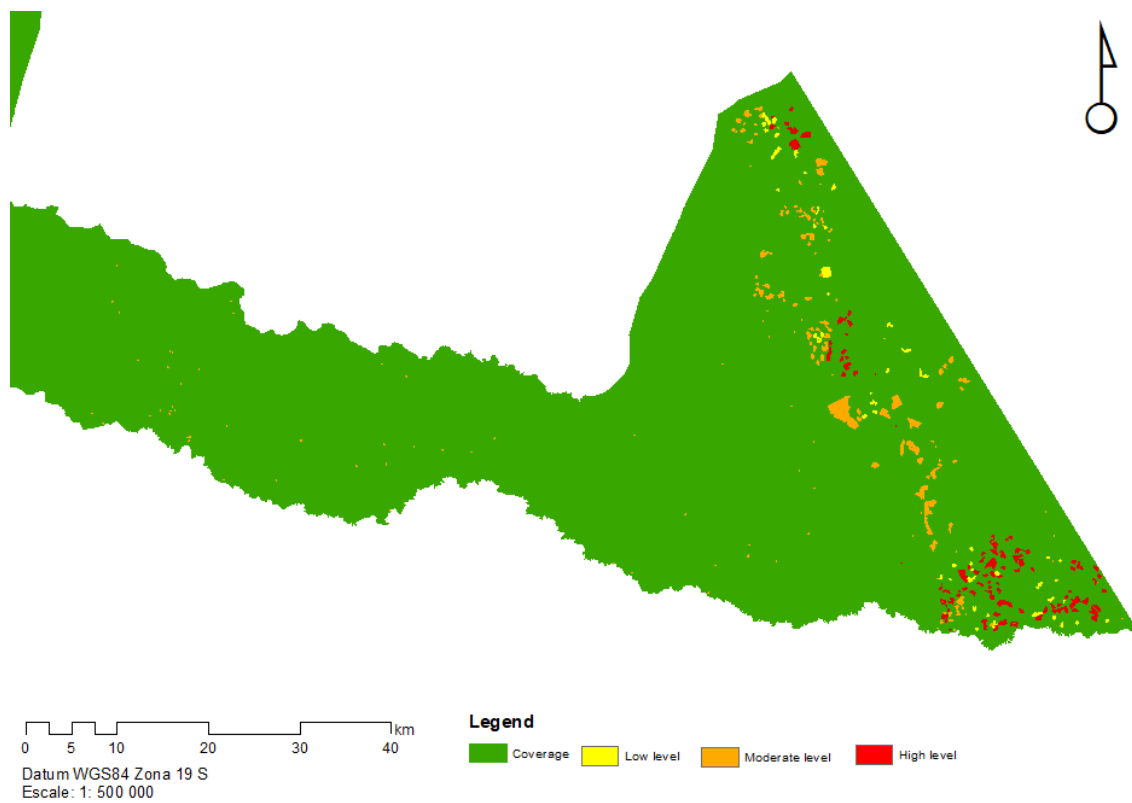

**Figure S12.** Burn severity using absolute, relative values from VH\_2 pre- and post-fire 2020 backscatter data; Equation 2 and 6.

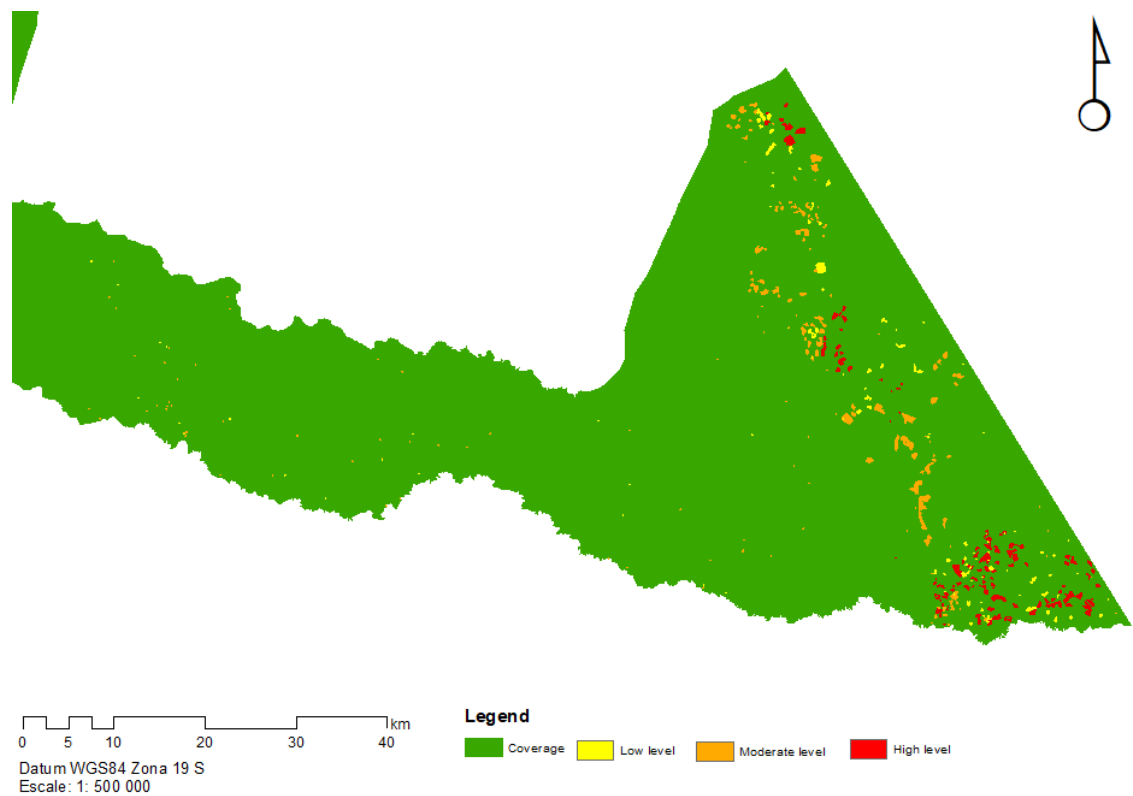

**Figure S13.** Burn severity using RADAR Burn Ratio (RBR) and RADAR Forest Degradation Index (RDFI) of pre- and post-fire 2020 VV and VH backscatter data; Equation 7, 8 and 9.
